# Supplementary material for: Size control of PtPb intermetallic nanoparticles prepared via microemulsions
Source: Royal Society of Chemistry journal article supplement (doi:10.1039/c1cp20159j), 2011-01-01
Supplement: c1cp20159j.pdf [file c1cp20159j.pdf]

## Electronic Supplementary Information (ESI)

### S1 Experimental Section

The preparation of metallic nanoparticles (NPs) via w/o-microemulsions is described elsewhere<sup>16</sup>. Bimetallic NPs were prepared at different overall mass fractions of the aqueous phase ( $w_A$ ). The compositions of the samples and the preparation conditions are presented in Table S1 (See Supporting Information). The characterization of the w/o-microemulsions which contain the metal salt and the reducing agent as well as the time evolution of the particle formation and growth in w/o-microemulsion was studied by small-angle X-ray scattering (SAXS) as described in Supporting Information. For particle characterization, HRTEM images and SAED patterns were collected on a JEOL 4000 FX operating at 400 keV. EDX was done on the Zeiss SESAM using an EDAX detector. All experiments were conducted at room temperature and ambient pressure. The nanoparticles were dissolved in ethanol and then deposited on thin holey carbon films (Plano, 300 mesh - *Artikel S147-3*). HRTEM images and SAED patterns were recorded on a 2kx2k CCD camera (Gatan UltraScan). For data analysis the Gatan DigitalMicrograph software was used. Lattice spacings were obtained from HRTEM images by linescans across lattice fringes. The diameter of diffraction rings was obtained by using the DiffTools package<sup>23</sup>. For calibration diffraction patterns of pure Si were used.

## S1.1 Nanoparticle Preparation

**Table S1:** Compositions of samples and preparation temperature used for the synthesis of Pt:Pb nanoparticles at different mass fractions of the aqueous phase  $w_A$ .  $\gamma_b$  represents the mass fraction of Brij30 and 1-octanol in the oil phase;  $\delta$  is the mass fraction of 1-octanol in the mixture of 1-octanol and Brij30;  $T_{wefb}$  is the phase transition temperature between the 1- and  $\bar{2}$ -phase region (*wefb*).

| Aqueous phase / mM                                                 | $w_A$ | $\gamma_b$ | $\delta$ | $T_{wefb} / ^\circ\text{C}$ | Sample |
|--------------------------------------------------------------------|-------|------------|----------|-----------------------------|--------|
| 13 mM $\text{H}_2\text{PtCl}_6$ : 13 mM $\text{Pb}(\text{NO}_3)_2$ | 0.10  | 0.114      | 0.37     | 28.0                        | 1      |
| 160 mM $\text{NaBH}_4$                                             | 0.10  | 0.095      | 0.24     | 28.0                        |        |
| 13 mM $\text{H}_2\text{PtCl}_6$ : 13 mM $\text{Pb}(\text{NO}_3)_2$ | 0.08  | 0.114      | 0.37     | 30.5                        | 2      |
| 160 mM $\text{NaBH}_4$                                             | 0.08  | 0.095      | 0.24     | 30.5                        |        |
| 13 mM $\text{H}_2\text{PtCl}_6$ : 13 mM $\text{Pb}(\text{NO}_3)_2$ | 0.06  | 0.114      | 0.37     | 34.0                        | 3      |
| 160 mM $\text{NaBH}_4$                                             | 0.06  | 0.095      | 0.22     | 34.0                        |        |
| 13 mM $\text{H}_2\text{PtCl}_6$ : 13 mM $\text{Pb}(\text{NO}_3)_2$ | 0.04  | 0.114      | 0.37     | 35.0                        | 4      |
| 160 mM $\text{NaBH}_4$                                             | 0.04  | 0.095      | 0.21     | 35.0                        |        |

## S1.2 Materials

The oil *n*-octane (99.5%) was purchased from Fluka. The alcohol 1-octanol (99%) and the surfactant Brij30 were purchased from Sigma Aldrich. Brij30 contains an average of four ethylene oxide groups and a linear alkyl chain of  $\text{C}_{12}\text{H}_{25}$ . The metal salts hexachloroplatinic acid ( $\text{H}_2\text{PtCl}_6 \cdot 6\text{H}_2\text{O}$ , 99.9%), lead (II) nitrate ( $\text{Pb}(\text{NO}_3)_2$ , 99.999%), and the reducing agent sodium borohydride ( $\text{NaBH}_4$ , 99%) were also supplied by Sigma Aldrich. Ethoxylated polyethylene imine (referred to as PEI20EO), with a molecular weight of about  $13\,000\text{ g mol}^{-1}$ , was kindly provided by BASF (80 wt.% aqueous solution). The polymer originated from a hyperbranched PEI of a molecular weight  $\sim 600\text{ g mol}^{-1}$  and the substitutable hydrogens on the primary and secondary nitrogens were replaced by ethoxylated chains containing on average 20 repeat units. All chemicals were used without further purification. The water was taken from a Millipore-Q water purification system.

### S1.3 Techniques for nanoparticle characterization

The SAXS measurements were performed on a SAXSess high-flux small-angle X-ray scattering instrument (Anton Paar, Austria), attached to a PW3830 X-ray generator (PANalytical) with a sealed-tube anode (Cu K $\alpha$  wavelength of 0.1542 nm). The generator was operated at 40 kV and 50 mA. Vacuum-tight refillable quartz capillaries (1 mm diameter, sample volume  $\leq 100 \mu\text{L}$ ) were used in order to determine the size and shape of the w/o-microemulsions containing the metal salts and the reducing agent, respectively. For kinetic studies, a vacuum-tight refillable quartz capillary in the flow cell unit was used. The w/o-microemulsion containing the metal salts was drawn into a syringe, which was then placed at one end of the flow cell sample holder, while the w/o-microemulsion containing the reducing agent was drawn into a syringe, which was placed at the other end of the flow cell sample holder. An exposure time of 0.5 seconds was used. The experiment started when the quartz capillary was filled with the w/o-microemulsion containing the metal salt. After measuring this sample for 10 s, the w/o-microemulsion containing the reducing agent was carefully and slowly injected via the syringe thus mixing the two reacting microemulsions. All experiments were performed at  $T_{\text{weft}}$ . The sample temperature was controlled with a thermostatted sample holder unit (TCS 120, Anton Paar). The 2-D scattered intensities were recorded on a CCD detector (Princeton Instruments) and were converted via SAXSQuant software (Anton Paar) to one dimensional scattering curves as a function of the magnitude of the scattering vector  $q = (4\pi/\lambda)\sin(\theta/2)$ , where  $\theta$  is the total scattering angle. All intensities were transmission-calibrated by normalizing the attenuated primary intensity at  $q = 0$  to unity and were corrected by subtracting the background scattering from the capillary and the solvent (octane). The size of the microemulsions droplets were determined via Guinier analysis (extrapolation to zero angle,  $q = 0.06 - 0.4 \text{ nm}^{-1}$ ) assuming the droplets as homogeneous spheres. Data were fitted with  $\ln(I) = \ln(I_0) - (R_G^2/3)q^2$ , where  $R_G$  is the radius of gyration. The particle radius  $R$  can be obtained by assuming that the particles are spheres, *i.e.*  $R^2 = (5/3)R_G^2$ .

## S2. Results

**Table S2.** Atomic composition of samples 1, 2, 3 and 4 (see Table S1) determined via EDX.

| Sample 1 / nm <sup>2</sup> | Pt:Pb atomic ratio | Sample 2 / nm <sup>2</sup> | Pt:Pb atomic ratio |
|----------------------------|--------------------|----------------------------|--------------------|
| 20                         | 73 : 27            | 20                         | 8 : 92             |
| 15                         | 70 : 30            | 200                        | 72 : 28            |
| 15                         | 73 : 27            | 20                         | 68 : 32            |
| 10                         | 65 : 35            | 20                         | 74 : 26            |
| 10                         | 68 : 32            | 10                         | 69 : 31            |
| 20                         | 4 : 96             | 20                         | 66 : 34            |
| Sample 3 / nm <sup>2</sup> | Pt:Pb atomic ratio | Sample 4 / nm <sup>2</sup> | Pt:Pb atomic ratio |
| 20                         | 75 : 25            | 100                        | 71 : 29            |
| 20                         | 72 : 28            | 10                         | 65 : 35            |
| 15                         | 77 : 23            | 10                         | 76 : 24            |
| 10                         | 71 : 29            | 10                         | 62 : 38            |
| 20                         | 75 : 25            | 15                         | 69 : 15            |
| 10                         | 68 : 32            | 20                         | 73 : 27            |
| 20                         | 6 : 94             | 20                         | 8 : 92             |

**Table S3.** Diameters  $d$  of the w/o-microemulsions containing the two metal salts  $\text{H}_2\text{PtCl}_6$  and  $\text{Pb}(\text{NO}_3)_2$  in a 1:1 molar ratio determined by SAXS, the mean number of Pt and Pb atoms per droplet and the calculated particle diameter  $d_{\text{calc}}$  of PtPb NPs;  $d_{\text{calc}}$  was calculated assuming

no exchange of materials among droplets and using the equation  $d = \sqrt[3]{\frac{6}{\pi}(N_{\text{Pt}}v_{\text{Pt}} + N_{\text{Pb}}v_{\text{Pb}})}$ ,

where  $N_{\text{Pt}}$  and  $N_{\text{Pb}}$  are the number of Pt and Pb atoms per nucleus, respectively, and  $v_{\text{Pt}} = 0.01551 \text{ nm}^3$  and  $v_{\text{Pb}} = 0.03136 \text{ nm}^3$  are the volumes of a single Pt(0) and Pb(0) atom, respectively; the atomic volume was calculated from the atomic mass ( $M_{\text{Pt}} = 195.08 \text{ g mol}^{-1}$ ,  $M_{\text{Pb}} = 207.2 \text{ g mol}^{-1}$ ), the density ( $\rho_{\text{Pt}} = 21.45 \text{ g cm}^{-3}$ ,  $\rho_{\text{Pb}} = 11.34 \text{ g cm}^{-3}$ ) and the Avogadro number as  $v = M_{\text{Pt}}/\rho_{\text{Pt}}N_{\text{A}}$ .

| $w_{\text{A}}$ | w/o- $\mu\text{e}$ ( $\text{H}_2\text{PtCl}_6 + \text{Pb}(\text{NO}_3)_2$ ) | Pt,Pb atoms | NPs                           |
|----------------|-----------------------------------------------------------------------------|-------------|-------------------------------|
|                | $d / \text{nm}$                                                             | per droplet | $d_{\text{calc}} / \text{nm}$ |
| 0.10           | $29.9 \pm 0.8$                                                              | 110,110     | 2.14                          |
| 0.08           | $26.1 \pm 0.8$                                                              | 73,73       | 1.87                          |
| 0.06           | $21.6 \pm 0.4$                                                              | 41,41       | 1.55                          |
| 0.04           | $17.2 \pm 0.1$                                                              | 21,21       | 1.23                          |

### S3. References

23. D. R. Mitchell, *Microscopy research and technique*, 2008, **71**, 588-593.
